# Supplementary material for: Neonatal encephalopathy: a systematic review of reported treatment outcomes
Source: PubMed Central journal article supplement — BMJ Paediatr Open. 2024 Sep 25;8(1):e002510. doi: 10.1136/bmjpo-2024-002510 (PMC11425948; doi:10.1136/bmjpo-2024-002510), 2024-09-25
Supplement: bmjpo-8-1-s001.pdf [file bmjpo-8-1-s001.pdf]

**Supplementary Information: Search Strategies COHESION Study**

**MEDLINE search for randomised trials**

| Category         | Search Term                                                                                    | Number (#) |
|------------------|------------------------------------------------------------------------------------------------|------------|
| <i>Condition</i> | Brain Ischemia/                                                                                | #1         |
|                  | Hypoxia, Brain/                                                                                | #2         |
|                  | Hypoxia Ischemia, Brain/                                                                       | #3         |
|                  | Hypoxi* isch*mi*<br>encephalopathy.mp.                                                         | #4         |
|                  | hypoxia brain.mp.                                                                              | #5         |
|                  | encephalopathy.mp.                                                                             | #6         |
|                  | cerebral isch*mia.mp.                                                                          | #7         |
|                  | cerebral hypoxia.mp.                                                                           | #8         |
|                  | perinatal asphyxia.mp.                                                                         | #9         |
|                  | perinatal hypoxic isch*mic<br>encephalopathy.mp.                                               | #10        |
|                  | asphyxia neonatorum/                                                                           | #11        |
|                  | exp Anoxia/                                                                                    | #12        |
|                  | exp Hypothermia, Induced/                                                                      | #13        |
|                  | exp hypothermia/                                                                               | #14        |
|                  | #1 OR #2 OR #3 OR #4 OR #5<br>OR #6 OR #7 OR #8 OR<br>#9 OR #10 OR #11 OR #12 OR<br>#13 OR #14 | #15        |
| <i>Patient</i>   | exp infant, newborn/                                                                           | #16        |
|                  | newborn*.ti,ab.                                                                                | #17        |
|                  | new born*.ti,ab.                                                                               | #18        |
|                  | newly born.ti,ab.                                                                              | #19        |
|                  | baby*.ti,ab.                                                                                   | #20        |
|                  | babies.ti,ab.                                                                                  | #21        |
|                  | premature.ti,ab.                                                                               | #22        |
|                  | prematurity.ti,ab.                                                                             | #23        |
|                  | preterm.ti,ab.                                                                                 | #24        |

|               |                                                                                                                                    |     |
|---------------|------------------------------------------------------------------------------------------------------------------------------------|-----|
|               | pre term.ti,ab.                                                                                                                    | #25 |
|               | low birth weight.ti,ab.                                                                                                            | #26 |
|               | VLBW.ti,ab.                                                                                                                        | #27 |
|               | LBW.ti,ab.                                                                                                                         | #28 |
|               | infant*.ti,ab.                                                                                                                     | #29 |
|               | infantile.ti,ab.                                                                                                                   | #30 |
|               | infancy.ti,ab.                                                                                                                     | #31 |
|               | neonat*.ti,ab.                                                                                                                     | #32 |
|               | #16 OR #17 OR #18 OR #19<br>OR #20 OR #21 OR<br>#22 OR #23 OR #24 OR<br>#25 OR #26 OR #27 OR<br>#28 OR #29 OR #30 OR #31<br>OR #32 | #33 |
| <i>Design</i> | randomized controlled trial.pt.                                                                                                    | #34 |
|               | controlled clinical trial.pt.                                                                                                      | #35 |
|               | randomized.ab.                                                                                                                     | #36 |
|               | placebo.ab.                                                                                                                        | #37 |
|               | clinical trials as topic.sh.                                                                                                       | #38 |
|               | randomly.ab.                                                                                                                       | #39 |
|               | trial.ti.                                                                                                                          | #40 |
|               | #34 OR #35 OR #36 OR<br>#37 OR #38 OR #39 OR #40                                                                                   | #41 |
|               | exp animals/ NOT humans.sh.                                                                                                        | #42 |
|               | #41 NOT #42                                                                                                                        | #43 |
|               | #15 AND #33 AND #43                                                                                                                | #44 |

**MEDLINE search for systematic reviews**

| <b>Category</b>                                                                                                            | <b>Search Term</b>                                                                                    | <b>Number (#)</b> |
|----------------------------------------------------------------------------------------------------------------------------|-------------------------------------------------------------------------------------------------------|-------------------|
| <i>Condition</i>                                                                                                           | Brain Ischemia/                                                                                       | #1                |
|                                                                                                                            | Hypoxia, Brain/                                                                                       | #2                |
|                                                                                                                            | Hypoxia Ischemia, Brain/                                                                              | #3                |
|                                                                                                                            | hypoxia isch*mia<br>encephalopathy.mp.                                                                | #4                |
|                                                                                                                            | hypoxic isch*mic<br>encephalopathy.mp.                                                                | #5                |
|                                                                                                                            | hypoxia brain.mp.                                                                                     | #6                |
|                                                                                                                            | encephalopathy.mp.                                                                                    | #7                |
|                                                                                                                            | cerebral isch*mia.mp.                                                                                 | #8                |
|                                                                                                                            | cerebral hypoxia.mp.                                                                                  | #9                |
|                                                                                                                            | perinatal asphyxia.mp.                                                                                | #10               |
|                                                                                                                            | perinatal hypoxic isch*mic<br>encephalopathy.mp.                                                      | #11               |
|                                                                                                                            | Asphyxia neonatorum/                                                                                  | #12               |
|                                                                                                                            | exp Anoxia/                                                                                           | #13               |
|                                                                                                                            | exp Hypothermia, Induced/                                                                             | #14               |
|                                                                                                                            | exp hypothermia/                                                                                      | #15               |
|                                                                                                                            | #1 OR #2 OR #3 OR #4 OR<br>#5 OR #6 OR #7 OR #8 OR<br>#9 OR #10 OR #11 OR #12<br>OR #13 OR #14 OR #15 | #16               |
| <i>Patient</i>                                                                                                             | exp infant, newborn/                                                                                  | #17               |
|                                                                                                                            | newborn*.ti,ab.                                                                                       | #18               |
|                                                                                                                            | new born.ti,ab.                                                                                       | #19               |
|                                                                                                                            | new borns.ti,ab.                                                                                      | #20               |
|                                                                                                                            | newly born.ti,ab.                                                                                     | #21               |
|                                                                                                                            | baby*.ti,ab.                                                                                          | #22               |
|                                                                                                                            | babies.ti,ab.                                                                                         | #23               |
|                                                                                                                            | premature.ti,ab.                                                                                      | #24               |
|                                                                                                                            | prematurity.ti,ab.                                                                                    | #25               |
|                                                                                                                            | preterm.ti,ab.                                                                                        | #26               |
|                                                                                                                            | pre term.ti,ab.                                                                                       | #27               |
|                                                                                                                            | low birth weight.ti,ab.                                                                               | #28               |
|                                                                                                                            | VLBW.ti,ab.                                                                                           | #29               |
|                                                                                                                            | LBW.ti,ab.                                                                                            | #30               |
|                                                                                                                            | infant.ti,ab.                                                                                         | #31               |
|                                                                                                                            | infant s.ti,ab.                                                                                       | #32               |
|                                                                                                                            | infants.ti,ab.                                                                                        | #33               |
|                                                                                                                            | infantile.ti,ab.                                                                                      | #34               |
|                                                                                                                            | infancy.ti,ab.                                                                                        | #35               |
| #17 OR #18 OR #19 OR<br>#20 OR 21 OR #22 OR #23<br>OR #23 OR #24 OR #25 OR<br>#26 OR #27 OR #28 OR<br>#29 OR #30 OR #31 OR | #36                                                                                                   |                   |

|                          |                                                 |     |
|--------------------------|-------------------------------------------------|-----|
|                          | #32 OR #33 OR #34 OR #35                        |     |
| <i>Design</i>            | Meta-Analysis as Topic.d.sh.                    | #37 |
|                          | meta analy\$.tw.                                | #38 |
|                          | metaanaly\$.tw.                                 | #39 |
|                          | Meta-Analysis.d.sh.                             | #40 |
|                          | (systematic adj (review\$1 or overview\$1)).tw. | #41 |
|                          | exp Review Literature as Topic.d.sh.            | #42 |
|                          | OR/#37-#42                                      | #43 |
|                          | cochrane.ab.                                    | #44 |
|                          | embase.ab.                                      | #45 |
|                          | (psychlit or psyclit).ab.                       | #46 |
|                          | (psychinfo or psycinfo).ab.                     | #47 |
|                          | (cinahl or cinhal).ab.                          | #48 |
|                          | science citation index.ab.                      | #49 |
|                          | bids.ab.                                        | #50 |
|                          | cancerlit.ab.                                   | #51 |
|                          | OR/#44-#51                                      | #52 |
|                          | reference list\$.ab.                            | #53 |
|                          | bibliograph\$.ab.                               | #54 |
|                          | hand-search\$.ab.                               | #55 |
|                          | relevant journals.ab.                           | #56 |
|                          | manual search\$.ab.                             | #57 |
|                          | OR/#53-#57                                      | #58 |
|                          | selection criteria.ab.                          | #59 |
|                          | data extraction.ab.                             | #60 |
|                          | #59 OR #60                                      | #61 |
|                          | Review.d.sh.                                    | #62 |
|                          | #61 AND #62                                     | #63 |
|                          | Comment.d.sh.                                   | #64 |
|                          | Letter.d.sh.                                    | #65 |
|                          | Editorial.d.sh.                                 | #66 |
|                          | Animal.d.sh.                                    | #67 |
|                          | Human.d.sh.                                     | #68 |
|                          | #67 NOT (#67 and #68)                           | #69 |
| OR/#65-#66,#69           | #70                                             |     |
| #43 OR #52 OR #58 OR #63 | #71                                             |     |
| #71 NOT #70              | #72                                             |     |
| #16 AND #36 AND #72      | #73                                             |     |

## Embase search for randomised trials

| Category         | Search Term                                                                           | Number (#) |
|------------------|---------------------------------------------------------------------------------------|------------|
| <i>Condition</i> | 'Brain Ischemia'/de                                                                   | #1         |
|                  | 'Hypoxia, Brain'/de                                                                   | #2         |
|                  | 'Hypoxia Ischemia, Brain'/de                                                          | #3         |
|                  | 'Hypoxi* isch*mi* encephalopathy'                                                     | #4         |
|                  | 'hypoxia brain'                                                                       | #5         |
|                  | 'encephalopathy'                                                                      | #6         |
|                  | 'cerebral isch*mia'                                                                   | #7         |
|                  | 'cerebral hypoxia'                                                                    | #8         |
|                  | 'perinatal asphyxia'                                                                  | #9         |
|                  | 'perinatal hypoxic isch*mic encephalopathy'                                           | #10        |
|                  | 'asphyxia neonatorum'/de                                                              | #11        |
|                  | 'Anoxia'/exp                                                                          | #12        |
|                  | 'Hypothermia, Induced'/exp                                                            | #13        |
|                  | 'hypothermia'/exp                                                                     | #14        |
|                  | #1 OR #2 OR #3 OR #4 OR #5 OR #6 OR #7 OR #8 OR #9 OR #10 OR #11 OR #12 OR #13 OR #14 | #15        |
| <i>Patient</i>   | 'infant, newborn'/exp                                                                 | #16        |
|                  | 'newborn*':ab,ti                                                                      | #17        |
|                  | 'new born*':ab,ti                                                                     | #18        |
|                  | 'newly born':ab,ti                                                                    | #19        |
|                  | 'baby*':ab,ti                                                                         | #20        |
|                  | 'babies':ab,ti                                                                        | #21        |
|                  | 'premature':ab,ti                                                                     | #22        |
|                  | 'prematurity':ab,ti                                                                   | #23        |
|                  | 'preterm':ab,ti                                                                       | #24        |
|                  | 'pre term':ab,ti                                                                      | #25        |
|                  | 'low birth weight':ab,ti                                                              | #26        |
|                  | 'VLBW':ab,ti                                                                          | #27        |
|                  | 'LBW':ab,ti                                                                           | #28        |
|                  | 'infant*':ab,ti                                                                       | #29        |
|                  | 'infantile':ab,ti                                                                     | #30        |
|                  | 'infancy':ab,ti                                                                       | #31        |
|                  | 'neonat*':ab,ti                                                                       | #32        |

|                          |                                                                                                                                    |     |
|--------------------------|------------------------------------------------------------------------------------------------------------------------------------|-----|
|                          | #16 OR #17 OR #18 OR #19<br>OR #20 OR #21 OR<br>#22 OR #23 OR #24 OR<br>#25 OR #26 OR #27 OR<br>#28 OR #29 OR #30 OR #31<br>OR #32 | #33 |
| <i>Design</i>            | 'randomized controlled trial'                                                                                                      | #34 |
|                          | 'controlled clinical trial'                                                                                                        | #35 |
|                          | 'randomized':ab                                                                                                                    | #36 |
|                          | 'placebo':ab                                                                                                                       | #37 |
|                          | 'clinical trials as topic'/de                                                                                                      | #38 |
|                          | 'randomly':ab                                                                                                                      | #39 |
|                          | 'Trial'                                                                                                                            | #40 |
|                          | #34 OR #35 OR #36 OR<br>#37 OR #38 OR #39 OR #40                                                                                   | #41 |
| animals NOT 'humans'/exp | #42                                                                                                                                |     |
|                          | #41 NOT #42                                                                                                                        | #43 |
|                          | #15 AND #33 AND #43                                                                                                                | #44 |

#### Embase search for systematic reviews

| Category                                                                                       | Search Term                                    | Number (#) |
|------------------------------------------------------------------------------------------------|------------------------------------------------|------------|
| <i>Condition</i>                                                                               | 'Brain Ischemia'/de                            | #1         |
|                                                                                                | 'Hypoxia, Brain'/de                            | #2         |
|                                                                                                | 'Hypoxia Ischemia,<br>Brain'/de                | #3         |
|                                                                                                | 'Hypoxi* isch*mi*<br>encephalopathy'           | #4         |
|                                                                                                | 'hypoxia brain'                                | #5         |
|                                                                                                | 'encephalopathy'                               | #6         |
|                                                                                                | 'cerebral isch*mia'                            | #7         |
|                                                                                                | 'cerebral hypoxia'                             | #8         |
|                                                                                                | 'perinatal asphyxia'                           | #9         |
|                                                                                                | 'perinatal hypoxic isch*mic<br>encephalopathy' | #10        |
|                                                                                                | 'asphyxia neonatorum'/de                       | #11        |
|                                                                                                | 'Anoxia'/exp                                   | #12        |
|                                                                                                | 'Hypothermia, Induced'/exp                     | #13        |
|                                                                                                | 'hypothermia'/exp                              | #14        |
| #1 OR #2 OR #3 OR #4 OR<br>#5 OR #6 OR #7 OR #8 OR<br>#9 OR #10 OR #11 OR #12<br>OR #13 OR #14 | #15                                            |            |
| <i>Patient</i>                                                                                 | 'infant, newborn'/exp                          | #16        |
|                                                                                                | 'newborn*':ab,ti                               | #17        |
|                                                                                                | 'new born*':ab,ti                              | #18        |

|               |                                                                                                                                    |     |
|---------------|------------------------------------------------------------------------------------------------------------------------------------|-----|
|               | 'newly born':ab,ti                                                                                                                 | #19 |
|               | 'baby*':ab,ti                                                                                                                      | #20 |
|               | 'babies':ab,ti                                                                                                                     | #21 |
|               | 'premature':ab,ti                                                                                                                  | #22 |
|               | 'prematurity':ab,ti                                                                                                                | #23 |
|               | 'preterm':ab,ti                                                                                                                    | #24 |
|               | 'pre term':ab,ti                                                                                                                   | #25 |
|               | 'low birth weight':ab,ti                                                                                                           | #26 |
|               | 'VLBW':ab,ti                                                                                                                       | #27 |
|               | 'LBW':ab,ti                                                                                                                        | #28 |
|               | 'infant*':ab,ti                                                                                                                    | #29 |
|               | 'infantile':ab,ti                                                                                                                  | #30 |
|               | 'infancy':ab,ti                                                                                                                    | #31 |
|               | 'neonat*':ab,ti                                                                                                                    | #32 |
|               | #16 OR #17 OR #18 OR<br>#19 OR #20 OR #21 OR<br>#22 OR #23 OR #24 OR<br>#25 OR #26 OR #27 OR<br>#28 OR #29 OR #30 OR<br>#31 OR #32 | #33 |
| <i>Design</i> | 'Meta Analysis'/exp                                                                                                                | #34 |
|               | (meta NEAR/2<br>analy\$):ab,ti,tn                                                                                                  | #35 |
|               | metaanalys\$:ab,ti,tn                                                                                                              | #36 |
|               | (systematic NEAR/2<br>review\$):ab,ti,tn                                                                                           | #37 |
|               | (systematic NEAR/2<br>overview\$):ab,ti,tn                                                                                         | #38 |
|               | Or/#34-38                                                                                                                          | #39 |
|               | cancerlit:ab                                                                                                                       | #40 |
|               | Cochrane:ab                                                                                                                        | #41 |
|               | Embase:ab                                                                                                                          | #42 |
|               | (psychlit or psyclit):ab                                                                                                           | #43 |
|               | (psychinfo or psycinfo):ab                                                                                                         | #44 |
|               | (cinahl or cinhal):ab                                                                                                              | #45 |
|               | 'science citation index':ab                                                                                                        | #46 |
|               | Bids:ab                                                                                                                            | #47 |
|               | Or/#40-#47                                                                                                                         | #48 |
|               | reference lists:ab                                                                                                                 | #49 |
|               | bibliograph\$:ab                                                                                                                   | #50 |
|               | 'hand-search\$':ab                                                                                                                 | #51 |
|               | 'manual search\$':ab                                                                                                               | #52 |
|               | 'relevant journals':ab                                                                                                             | #53 |
|               | Or/#49-#53                                                                                                                         | #54 |
|               | 'data extraction':ab                                                                                                               | #55 |
|               | 'selection criteria':ab                                                                                                            | #56 |
| #55 or #56    | #57                                                                                                                                |     |
| 'Review'/it.  | #58                                                                                                                                |     |
| #57 and #58   | #59                                                                                                                                |     |

|  |                          |     |
|--|--------------------------|-----|
|  | 'Letter'/it              | #60 |
|  | 'Editorial'/it           | #61 |
|  | 'animal'/de              | #62 |
|  | 'human'/de               | #63 |
|  | #62 not (#62 and #63)    | #64 |
|  | or/#60-#61,#64           | #65 |
|  | #39 or #48 or #54 or #59 | #66 |
|  | #66 not #65              | #67 |
|  | #15 AND #33 AND #67      | #68 |

## Cochrane CENTRAL

| Category                                                                              | Search Term                                                    | Number (#) |
|---------------------------------------------------------------------------------------|----------------------------------------------------------------|------------|
| <i>Condition</i>                                                                      | MeSH descriptor: [Brain Ischemia] this term only               | #1         |
|                                                                                       | Hypoxia, Brain/                                                | #2         |
|                                                                                       | Hypoxia Ischemia, Brain/                                       | #3         |
|                                                                                       | Hypoxi* isch*mi* encephalopathy.mp.                            | #4         |
|                                                                                       | hypoxia brain.mp.                                              | #5         |
|                                                                                       | encephalopathy.mp.                                             | #6         |
|                                                                                       | cerebral isch*mia.mp.                                          | #7         |
|                                                                                       | cerebral hypoxia.mp.                                           | #8         |
|                                                                                       | perinatal asphyxia.mp.                                         | #9         |
|                                                                                       | perinatal hypoxic isch*mic encephalopathy.mp.                  | #10        |
|                                                                                       | asphyxia neonatorum/                                           | #11        |
|                                                                                       | exp Anoxia/                                                    | #12        |
|                                                                                       | exp Hypothermia, Induced/                                      | #13        |
|                                                                                       | exp hypothermia/                                               | #14        |
| #1 OR #2 OR #3 OR #4 OR #5 OR #6 OR #7 OR #8 OR #9 OR #10 OR #11 OR #12 OR #13 OR #14 | #15                                                            |            |
| <i>Patient</i>                                                                        | MESH DESCRIPTOR Infant, Newborn EXPLODE ALL AND CENTRAL:TARGET | #16        |
|                                                                                       | Infant:ti,ab,kw                                                | #17        |
|                                                                                       | infants                                                        | #18        |
|                                                                                       | infant's                                                       | #19        |
|                                                                                       | "infant s"                                                     | #20        |
|                                                                                       | infantile                                                      | #21        |
| infancy                                                                               | #22                                                            |            |



|                             |                                               |     |
|-----------------------------|-----------------------------------------------|-----|
|                             | newborn*                                      | #23 |
|                             | "new born"                                    | #24 |
|                             | "new borns"                                   | #25 |
|                             | "newly born"                                  | #26 |
|                             | neonat*                                       | #27 |
|                             | baby*                                         | #28 |
|                             | babies                                        | #29 |
|                             | premature                                     | #30 |
|                             | prematures                                    | #31 |
|                             | prematurity                                   | #32 |
|                             | preterm                                       | #33 |
|                             | preterms                                      | #34 |
|                             | "pre term"                                    | #35 |
|                             | premies                                       | #36 |
|                             | "low birth weight"                            | #37 |
|                             | "low birthweight"                             | #38 |
|                             | VLBW                                          | #39 |
|                             | LBW                                           | #40 |
|                             | ELBW                                          | #41 |
|                             | NICU                                          | #42 |
|                             | OR #16-#42                                    | #43 |
| <i>Design</i>               | randomized controlled trial.pt.               | #44 |
|                             | controlled clinical trial.pt.                 | #45 |
|                             | randomized.ab.                                | #46 |
|                             | placebo.ab.                                   | #47 |
|                             | clinical trials as topic.sh.                  | #48 |
|                             | randomly.ab.                                  | #49 |
|                             | trial.ti.                                     | #50 |
|                             | #44 OR #45 OR #46 OR #47 OR #48 OR #49 OR #50 | #51 |
| exp animals/ NOT humans.sh. | #52                                           |     |
|                             | #51 NOT #52                                   | #53 |
|                             | #15 AND #43 AND #53                           | #54 |

### Cochrane Database of Systematic Reviews (CDSR)

| Category         | Search Term                                      | Number (#) |
|------------------|--------------------------------------------------|------------|
| <i>Condition</i> | MeSH descriptor: [Brain Ischemia] this term only | #1         |
|                  | Hypoxia, Brain/                                  | #2         |
|                  | Hypoxia Ischemia, Brain/                         | #3         |

|                    |                                                                                       |     |
|--------------------|---------------------------------------------------------------------------------------|-----|
|                    | Hypoxi* isch*mi*encephalopathy.mp.                                                    | #4  |
|                    | hypoxia brain.mp.                                                                     | #5  |
|                    | encephalopathy.mp.                                                                    | #6  |
|                    | cerebral isch*mia.mp.                                                                 | #7  |
|                    | cerebral hypoxia.mp.                                                                  | #8  |
|                    | perinatal asphyxia.mp.                                                                | #9  |
|                    | perinatal hypoxic isch*mic encephalopathy.mp.                                         | #10 |
|                    | asphyxia neonatorum/                                                                  | #11 |
|                    | exp Anoxia/                                                                           | #12 |
|                    | exp Hypothermia, Induced/                                                             | #13 |
|                    | exp hypothermia/                                                                      | #14 |
|                    | #1 OR #2 OR #3 OR #4 OR #5 OR #6 OR #7 OR #8 OR #9 OR #10 OR #11 OR #12 OR #13 OR #14 | #15 |
| <i>Patient</i>     | MESH DESCRIPTOR<br>Infant, Newborn EXPLODE<br>ALL AND<br>CENTRAL:TARGET               | #16 |
|                    | Infant:ti,ab,kw                                                                       | #17 |
|                    | infants                                                                               | #18 |
|                    | infant's                                                                              | #19 |
|                    | "infant s"                                                                            | #20 |
|                    | infantile                                                                             | #21 |
|                    | infancy                                                                               | #22 |
|                    | newborn*                                                                              | #23 |
|                    | "new born"                                                                            | #24 |
|                    | "new borns"                                                                           | #25 |
|                    | "newly born"                                                                          | #26 |
|                    | neonat*                                                                               | #27 |
|                    | baby*                                                                                 | #28 |
|                    | babies                                                                                | #29 |
|                    | premature                                                                             | #30 |
|                    | prematures                                                                            | #31 |
|                    | prematurity                                                                           | #32 |
|                    | preterm                                                                               | #33 |
|                    | preterms                                                                              | #34 |
|                    | "pre term"                                                                            | #35 |
| premies            | #36                                                                                   |     |
| "low birth weight" | #37                                                                                   |     |
| "low birthweight"  | #38                                                                                   |     |
| VLBW               | #39                                                                                   |     |
| LBW                | #40                                                                                   |     |

|  |             |     |
|--|-------------|-----|
|  | ELBW        | #41 |
|  | NICU        | #42 |
|  | OR #16-#42  | #43 |
|  | #15 AND #43 | #44 |
